# Supplementary material for: Transcriptional Profiling Identifies Upregulation of Neuroprotective Pathways in Retinitis Pigmentosa
Source: MDPI journal article supplement (doi:10.3390/ijms22126307), 2021-06-11
Supplement: s1 [file s1]

| Gene          | Species             | Orientation | Sequence 5' - 3'        |
|---------------|---------------------|-------------|-------------------------|
| <i>Ccl2</i>   | <i>Mus musculus</i> | sense       | catccacgtgttggtca       |
|               |                     | antisense   | gatcatcttgctggtgaatgagt |
| <i>Edn2</i>   | <i>Mus musculus</i> | sense       | acctcctccgaaagctgag     |
|               |                     | antisense   | tttctgtcacctctggctgta   |
| <i>Fgf2</i>   | <i>Mus musculus</i> | sense       | ccaaccggtaccttgctatg    |
|               |                     | antisense   | ccagtcgttcaaagaagaacac  |
| <i>Gfap</i>   | <i>Mus musculus</i> | sense       | tcgagatcgccacctacag     |
|               |                     | antisense   | gtctgtacaggaatggtgatgc  |
| <i>Gnb2l1</i> | <i>Mus musculus</i> | sense       | tctgcaagtacacggtccag    |
|               |                     | antisense   | acgatgatagggttgctgc     |
| <i>Iba1</i>   | <i>Mus musculus</i> | sense       | ggatttgcaaggaggaaaag    |
|               |                     | antisense   | tgggatcatcgaggaattg     |
| <i>Lif</i>    | <i>Mus musculus</i> | sense       | aaacggcctgcatctaagg     |
|               |                     | antisense   | agcagcagtaagggcacaat    |
| <i>Ubc</i>    | <i>Mus musculus</i> | sense       | gtctgctgtgtgaggactgc    |
|               |                     | antisense   | cctccagggtgatggtctta    |

Table 1: Oligonucleotides for qPCR
